# Supplementary material for: Controls over debris flow initiation in glacio-volcanic environments in the Southern Andes
Source: Copernicus journal article supplement (doi:10.5194/egusphere-2025-1394), 2025-04-09
Supplement: Supplementary file [file egusphere-2025-1394-AC2-supplement.pdf]

## Reviewer #2:

### General Comment

**RC2\_1** The manuscript titled "*Controls over debris flow initiation in glacio-volcanic environments in the Southern Andes*" presents a comprehensive analysis of the mechanisms responsible for debris flow initiation in the Ñisoleufu sector, Southern Chile. It effectively integrates geomorphological, geotechnical, hydrometeorological, and remote sensing analyses to assess the factors controlling debris flow occurrence in a complex glacio-volcanic setting. The study's use of multi-source data strengthens the reliability of the findings.

However, the manuscript would benefit from a clearer presentation of the connections between controlling factors and observed events, as well as a more explicit discussion of implications for hazard assessment.

**A:** We appreciate this comment which allowed us to improve both the clarity and scientific value of our manuscript. Following the reviewer's suggestion, we have revised key sections of the manuscript (Abstract, Discussion, Conclusion) to better articulate the connections between the geomorphological, geotechnical, hydrometeorological, and surface deformation factors with the observed debris flow event in Ñisoleufu. In particular, the abstract was slightly modified to reflect this integrated perspective, underscoring the relevance of our findings for improving debris-flow risk forecasting in the Southern Andes. We add the lines 41-42. In the discussion section, we restructured the introductory (lines 335-336) and final (lines 450-452) paragraphs to explicitly outline how each controlling factor contributed to the triggering of the debris flow. This framing now provides a clearer causal linkage between the environmental conditions and the observed event. Finally, we strengthened the conclusions, where we now highlight the broader implications of our findings for hazard assessment and early warning systems in glacio-volcanic terrains. We stress the importance of incorporating hydrogeotechnical and meteorological properties (e.g., tephra-over-varve systems, soil moisture dynamics, extreme rainfalls), into regional debris-flow susceptibility models (lines 478-482).

### Specific Comments

#### Introduction

**RC2\_2** The introduction provides a comprehensive background but could be more focused, particularly in the discussion of previous studies.

**A:** We sincerely appreciate the reviewer's insightful observation. We have added a new paragraph incorporating international case studies to provide a more comprehensive background and strengthen the context of our contribution.

**Original text:**

Debris flows have occurred more frequently due to climate change, resulting in an increase in episodes of extreme rainfall (Jakob and Lambert 2009; Lee 2017; Fustos et al., 2017; Dey and Sengupta 2018) and mainly related to fast changes of soil water content (Fustos et al., 2021). In South America, these common landslide phenomena produce widespread damages, representing a significant threat to human life (e.g. Sepúlveda and Petley 2015; Vega and Hidalgo 2016; Garcia-Delgado et al. 2022). Consequently, the need to forecast (Fustos et al., 2020a) and mitigate (Fustos et al., 2021b) the effects of these events has become a high priority for governments facing increasing episodes of rainfall-induced landslides (RIL) linked with climate change. An accurate forecast needs precise understanding of the triggering conditions of debris flows. South America has limited knowledge of the conditioning factors and triggering conditions of flows, which reduces the capacity of authorities and stakeholders to propose science-based decisions.

Understanding the impact of debris flows in glacial environments is critical in the Chilean southern Andes, particularly due to the most part of the inhabitants lives there. Changes of precipitation patterns related to climate change, particularly fast and intense rainfall events, could amplify the frequency and magnitude of debris flows (Fustos et al., 2022). An increase of extreme hydrometeorological events affecting slopes in glacial settings is observed, whose mechanical properties and geomorphology have evolved since the Last Glacial Maximum (Fustos-Toribio et al., 2021; Somos-Valenzuela et al., 2020; Ochoa-Cornejo et al. 2025). Despite the significance of these events to the population, considerable uncertainty remains about how the interaction between volcanic-derived soils over glacial landforms will respond to extreme hydrometeorological events.

The landslide generation from extensional failures to surface deformation stands out, mainly due to gravity and surface erosion in high precipitation environments (Xie et al., 2020; Yi et al., 2021). Over time, these failures expand and deepen, weakening the soil and predisposing it to landslides, especially under water-saturated conditions or heavy rainfall (Fustos et al., 2017; Wang et al., 2024). The capacity to oversee these extensional failures in remote areas close to roads is an open question yet, mainly in South America. Large landslides can, under certain conditions, transform into debris flows when the slid material mixes with water, increasing its fluidity like the Villa Santa Lucia event in the Chilean Patagonia (Somos-Valenzuela et al., 2020). These debris flows are fast and destructive, capable of

transporting large amounts of material and causing significant damage to infrastructure and ecosystems, as well as posing a serious hazard to nearby communities (Hirschberg et al., 2021). The occurrence of debris flows in volcanic environments is a subject of significant scientific interest (Cheung & Giardino, 2023), primarily due to the intricate nature of volcanic soils and their inherent textural variability (Thompson et al., 2023), which directly impacts water content dynamics. In the Southern Andes region, there remains a conspicuous lack of understanding regarding how these textural variations influence the hydraulic response of these soils during extreme hydrometeorological events. Over the past four decades, this area has witnessed substantial volcanic activity (Moreno-Yaeger et al., 2024), resulting in extensive deposition of tephra that has significantly contributed to the heightened occurrence of debris slides and debris flows (Korup et al., 2019). Despite these recurrent occurrences, substantial gaps persist in comprehending the variability of textural and hydraulic properties of volcanic soils under the influence of extreme hydrometeorological events. Previous studies suggested the need to seek and address the textural and hydraulic properties of volcanic soils, constraining the hydraulic and geomechanical conditions that enable the debris flow generation (Fustos et al., 2021; Kostynick et al., 2022). These constraints become essential to generate accurate planning over the territory, allowing to save lives and develop accurate early warning systems.

Debris flows are influenced by soil hydraulic characteristics and the intensity/duration of rainfall events (Singh and Kumar, 2021), in which rainfall intensities serve as crucial predictors in mountainous regions (Chang et al., 2017; Fustos-Toribio et al., 2022). Moreover, coarse-grained volcanic soils exhibit transient increases in pore pressure during intense rainfall events (Huang et al., 2012). Conversely, fine-grained soils with low infiltration rates do not experience significant changes in the pore pressure, generating failures due to decreased soil shear strength (Dahal et al., 2008; 2011). Hence, understanding soil composition and granulometric features is pivotal in assessing debris flow susceptibility worldwide.

In this paper, we analyse the precursory surface deformation related to tensile cracks leading to the Ñisoleufu debris flow event (May 31st, 2021). We utilised a multi-temporal InSAR approach with Sentinel-1 C-band SAR data, enabling us to create time series plots of deformation before the landslide and compare them with available daily precipitation records from nearby weather stations and satellite measurements. By combining remote sensing data, weather records, and soil laboratory analyses, we aim to provide valuable insights into the factors leading to such events and, consequently, improve hazard assessment and management in zones with soils derived from explosive volcanic events.

### Modified text:

Episodes of extreme rainfall have increased due to climate change, resulting in a greater frequency of debris flows (Jakob and Lambert 2009; Lee 2017; Fustos et al., 2017; Dey and Sengupta 2018) and mainly related to fast changes of soil water content (Fustos et al., 2021). Currently, mass wasting processes produce widespread damages, representing a significant threat to human life (Sepúlveda and Petley 2015; Vega and Hidalgo 2016; Garcia-Delgado et al. 2022). Consequently, the need to forecast (Fustos et al., 2020a) and mitigate (Fustos et al., 2021b) the effects of these events has become a high priority for governments facing increasing episodes of rainfall-induced landslides (RIL) linked with climate change. An accurate assessment of potential debris flows to regional scale needs precise understanding of their triggering and controlling conditions. Therefore, we assessed the main conditioning and triggering conditions of debris flows in Southern Andes in order to understand their evolution from stable slope to mass wasting event.

Worldwide, the increasing frequency and intensity of such extreme precipitation events exacerbated by climate change to regional scale (Stoffel et al., 2013; Pavlova et al., 2018) introduce severe threats to human life and property. Changing precipitation patterns related to extreme precipitation, lead to conditions conducive for debris flows in wide areas in North America (Bovis et al., 1999), Asia (Ma et al., 2013; Chang et al., 2017), Europe (Malet et al., 2005; Stoffel et al., 2013; Pavlova et al., 2018) and South America (Sepúlveda et al., 2013; Sepúlveda et al., 2014; Fustos et al., 2022). Stand out heavy tropical storms, such as Taiwan, increasing debris flow incidents (Chang et al., 2024) and compromising the safety of urban areas located near mountainous terrains (Chen et al., 2015; Kang et al., 2017). The Wenchuan Earthquake in China exemplifies how seismic activity can trigger extensive debris flows, resulting in not only immediate destruction but also long-lasting hazards due to the formation of landslide-dammed lakes that threaten downstream communities (Cui et al., 2009; Ma et al., 2013; Wang & Yan, 2015). Accurate forecasting of debris flow events is vital for disaster preparedness and mitigation. Understanding the triggering conditions—including rainfall intensity, groundwater levels, and geological features—is essential for developing conceptual models that represent the regional conditions that could control a debris flow initiation. Debris flows are influenced by soil hydraulic characteristics and the intensity/duration of rainfall events (Singh and Kumar, 2021), in which rainfall intensities serve as crucial predictors in mountainous regions (Chang et al., 2017; Fustos-Toribio et al., 2022). Moreover, coarse-grained volcanic soils exhibit transient increases in pore pressure during intense rainfall events (Huang et al., 2012). Conversely, fine-grained soils with low infiltration rates do not experience significant changes in the pore pressure, generating failures due to decreased soil shear strength (Dahal et al., 2008; 2011). Hence,

understanding soil composition and granulometric features is pivotal in assessing debris flow susceptibility worldwide. Debris flows are mainly controlled by the geomorphological features and the specific geological evolution of each region of the planet, highlighting the need for localized and context-specific approaches for their study and management. One of the next frontier corresponds to constrain the debris flow generation in glacial environments under changing precipitation events related to climate change.

Nowadays, understanding the impact of debris flows in glacial environments becomes critical in the Chilean southern Andes, particularly due to the most part of the inhabitants live there. Changes of precipitation patterns related to climate change, particularly fast and intense rainfall events, could amplify the frequency and magnitude of debris flows (Fustos et al., 2022). An increase of extreme hydrometeorological events affecting slopes in glacial settings is observed, whose mechanical properties and geomorphology have evolved since the Last Glacial Maximum (Fustos-Toribio et al., 2021; Somos-Valenzuela et al., 2020; Ochoa-Cornejo et al. 2025). Considerable uncertainty remains about how the interaction between volcanic-derived soils over glacial landforms will respond to extreme hydrometeorological events. One of the current models for initiation of debris flows is related to slow deforming surfaces in hillslopes, mainly due to gravity and surface erosion during high precipitation events (Xie et al, 2020; Yi et al, 2021). Slow surface deformation could lead to extensional failures that could expand and deepen, generating landslides and evolving into debris flows, especially under water-saturated conditions or heavy rainfall (Gregoretti, 2000; Fustos et al., 2017; Wang et al., 2024). The capacity to oversee these extensional failures in remote areas close to roads is an open question yet, mainly in Southern Andes.

Historical debris flow events in the Southern Andes remain subject to uncertain conditioning factors. The transformation of landslides into debris flows typically occurs when sliding material incorporates water, significantly increasing its fluidity—as observed in the Villa Santa Lucía event in Chilean Patagonia (Somos-Valenzuela et al., 2020). The occurrence of debris flows in volcanic settings is of considerable scientific interest (Cheung & Giardino, 2023), largely due to the complex nature of volcanic soils and their marked textural variability (Thompson et al., 2023), which strongly influence water retention and infiltration dynamics. Recurrent debris flows in the Osorno volcano exemplify the role of intense rainfall events and the mobilization of autobrecciated lava blocks in initiating such processes (Fustos et al., 2022). Although numerical modeling has estimated total flow volumes (ranging from  $4.7 \times 10^5$  to  $5.5 \times 10^5 \text{ m}^3$ ) highlighting the high sensitivity of debris flow generation to the initial water content, a comprehensive conceptual model remains lacking. Over the past four decades, the Southern Andes has experienced significant volcanic activity (Galletto et al., 2023), resulting in

widespread tephra deposition that has contributed to increased frequencies of debris flows (Korup et al., 2019). Nevertheless, critical knowledge gaps persist regarding the spatial and temporal variability of the textural and hydraulic properties of volcanic soils, particularly under extreme hydrometeorological conditions. Addressing these gaps is crucial to better constrain the hydraulic and geomechanical conditions that lead to debris flow initiation (Fustos et al., 2021; Kostynick et al., 2022). Such understanding is fundamental for effective territorial planning, risk mitigation, and the development of robust early warning systems.

In this paper, we analyse the precursory surface deformation related to tensile cracks leading to the Ñisoleufu debris flow event (May 31<sup>st</sup>, 2021). We utilised a multi-temporal InSAR approach with Sentinel-1 C-band SAR data, enabling us to create time series plots of deformation before the landslide and compare them with available daily precipitation records from nearby weather stations and satellite measurements. By combining remote sensing data, weather records, and soil laboratory analyses, we aim to provide valuable insights into the factors leading to such events and, consequently, improve hazard assessment and management in zones with soils derived from explosive volcanic events.

**RC2\_3** Some references to regional climate impacts could be condensed to streamline the narrative.

**A:** We agree. Now, we introduced additional information in the first part of a new second paragraph.

**Additional information in second paragraph:**

Worldwide, the increasing frequency and intensity of such extreme precipitation events exacerbated by climate change to regional scale (Stoffel et al., 2013; Pavlova et al., 2014) introduce severe threats to human life and property. Changing precipitation patterns related to extreme precipitation, lead to conditions conducive for debris flows in wide areas in North America (Bovis et al., 1999), Asia (Ma et al., 2013; Chang et al., 2017), Europe (Malet et al., 2005; Stoffel et al., 2013; Pavlova et al., 2014) and South America (Sepúlveda et al., 2013; Sepúlveda et al., 2014; Fustos et al., 2022). Stand out heavy tropical storms, such as Taiwan, increasing debris flow incidents (Chang et al., 2024) and compromising the safety of urban areas located near mountainous terrains (Chen et al., 2015; , Kang et al., 2017). The Wenchuan Earthquake in China exemplifies how seismic activity can trigger extensive debris flows, resulting in not only immediate destruction but also long-lasting hazards due to the formation of landslide-dammed lakes that threaten downstream communities (Cui et al., 2009; Ma et al., 2013; Wang & Yan, 2015). Accurate forecasting of debris flow events is vital for disaster preparedness and mitigation. Understanding the triggering conditions—including rainfall intensity, groundwater levels, and geological features—is

essential for developing conceptual models that represent the regional conditions that could control a debris flow initiation. Debris flows are influenced by soil hydraulic characteristics and the intensity/duration of rainfall events (Singh and Kumar, 2021), in which rainfall intensities serve as crucial predictors in mountainous regions (Chang et al., 2017; Fustos-Toribio et al., 2022). Moreover, coarse-grained volcanic soils exhibit transient increases in pore pressure during intense rainfall events (Huang et al., 2012). Conversely, fine-grained soils with low infiltration rates do not experience significant changes in the pore pressure, generating failures due to decreased soil shear strength (Dahal et al., 2008; 2011). Hence, understanding soil composition and granulometric features is pivotal in assessing debris flow susceptibility worldwide. Debris flows mainly controlled by the geomorphological features and the specific geological evolution of each region of the planet, highlighting the need for localized and context-specific approaches for their study and management. One of the next frontier correspond to constraint the debris flow generation under glacial environment under changing precipitation events related to climate change.

**RC2\_3** The citations provided lack robustness for a proper framing of debris flows, as most references are from the last 3-4 years. Correct this by adding relevant and foundational studies.

**A:** We agree and appreciate this observation. We have introduced a deep review of events and literature review, considering the poor understanding of debris flow events in South America. We focused on the Wos contribution with high influence in the field, considering citing metrics.

#### **Literature now included:**

Bovis, M. J. and Jakob, M.: The role of debris supply conditions in predicting debris flow activity, *Earth Surf. Process. Landforms*, 24, 1039–1054, [https://doi.org/10.1002/\(sici\)1096-9837\(199910\)24:11<1039::aid-esp29>3.0.co;2-u](https://doi.org/10.1002/(sici)1096-9837(199910)24:11<1039::aid-esp29>3.0.co;2-u), 1999.

Gregoretti, C.: The initiation of debris flow at high slopes: experimental results, *Journal of Hydraulic Research*, 38, 83–88, <https://doi.org/10.1080/00221680009498343>, 2000.

Ma, C., Hu, K., and Tian, M.: Comparison of debris-flow volume and activity under different formation conditions, *Nat Hazards*, 67, 261–273, <https://doi.org/10.1007/s11069-013-0557-6>, 2013.

Malet, J.-P., Laigle, D., Remaître, A., and Maquaire, O.: Triggering conditions and mobility of debris flows associated to complex earthflows, *Geomorphology*, 66, 215–235, <https://doi.org/10.1016/j.geomorph.2004.09.014>, 2005.

Pavlova, I., Jomelli, V., Brunstein, D., Grancher, D., Martin, E., and Déqué, M.: Debris flow activity related to recent climate conditions in the French Alps: A regional investigation, *Geomorphology*, 219, 248–259, <https://doi.org/10.1016/j.geomorph.2014.04.025>, 2014.

Stoffel, M., Mendlik, T., Schneuwly-Bollschweiler, M., and Gobiet, A.: Possible impacts of climate change on debris-flow activity in the Swiss Alps, *Climatic Change*, 122, 141–155, <https://doi.org/10.1007/s10584-013-0993-z>, 2013.

**RC2\_4** Additionally, the transition between topics is somewhat abrupt, lacking fluidity.

**A:** We sincerely appreciate the reviewer's comments and observations and apologise for the shortcomings in the original writing, which did not convey the intended focus or depth of analysis. We have carefully revised and restructured the text to enhance its coherence and scientific rigour.

In the revised version, the first paragraph now provides a more focused description of the core issue, emphasising the transformation of landslides into debris flows in volcanic settings under intense rainfall, and highlighting the critical role of the textural variability of volcanic soils. The second paragraph expands the discussion to a global perspective, incorporating recent and foundational literature to address comment **RC2\_3**. This broader context helps situate our case study within a widely recognised scientific problem. The third paragraph underscores the need to better understand and constrain the controlling factors in glacio-volcanic environments, where geomorphological and hydrometeorological extremes can significantly influence debris flow initiation. This section shows the importance of integrating local characteristics into such analyses. The fourth paragraph narrows the focus to the Southern Andes, presenting two iconic case studies—Osorno and Villa Santa Lucía. These examples illustrate existing limitations in our understanding of conditioning factors, particularly regarding water content and the properties of mobilised material. Finally, the fifth paragraph concludes the section by emphasising the urgency of developing integrated conceptual models to support effective land-use planning.

## Methodology

It would be important to include the location of the meteorological stations in one of the displayed figures to provide spatial context for the data collection.

**A:** We agree, now we include an additional figure as Figure 1, including the location of the meteorological stations.

**Figure 1** Rainfall-Induced mass wasting in Southern Andes. A) Regional map of Ice-sheet extension during 35 ka and 20 ka as an example, and volcanoes emplaced in the area. B) Zoom to study area with Ñisoleufu in Northern Ice sheet sector showing the



weather stations. C) Zoom to Northern Patagonian area showing correlation between mass wasting events and moraine lines (blue line). D) Zoom to the Osorno volcano area showing the high debris flow generation area discussed in Fustos et al., 2022.

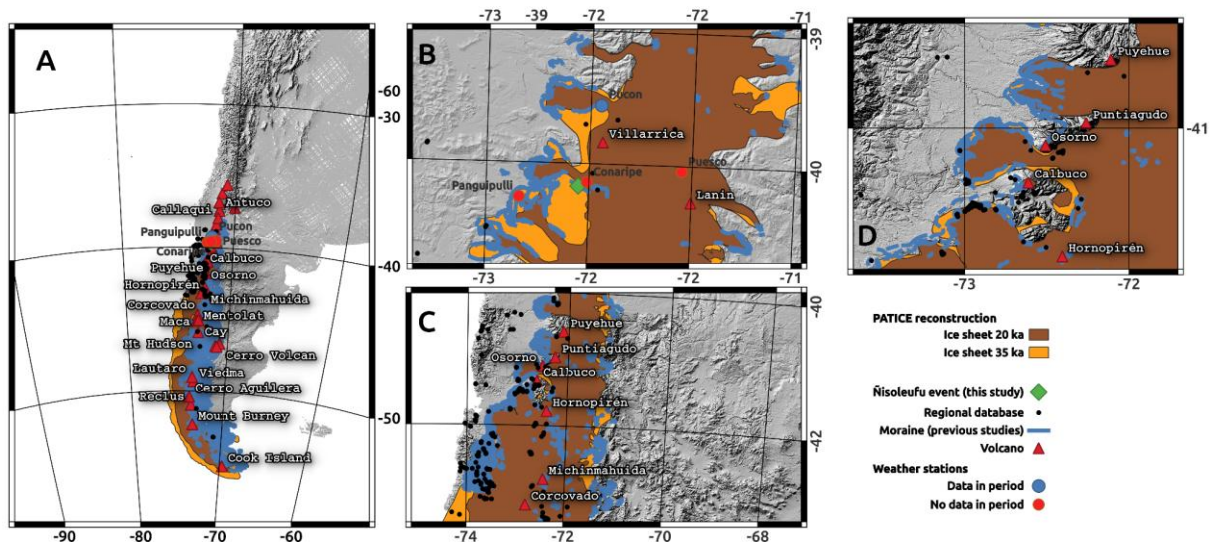

## Results

The results are comprehensive, but the presentation is occasionally repetitive. For example, the discussion of soil stratigraphy (Lines 200-240) could be condensed to highlight the most critical observations.

**A:** We appreciate the reviewer's constructive suggestion. We agree that the section describing soil stratigraphy can be condensed to emphasize the key features relevant to the mechanisms of soil saturation and landslide triggering. Accordingly, we have revised Lines 200–250 to focus on the most significant stratigraphic observations, namely: the alternation between volcanic ash-falls and organic soil development over a low-permeability glacial substrate. This reorganization improves the clarity of the results and avoids unnecessary repetition.

### Original text in lines (200-240).

In relation to the channelled flow deposits, the blocks and gravels are predominantly (~75%) composed of material from Sierra Quinchilca, while a smaller proportion (~25%) is composed of granodiorite from the Futrono-Riñihue Batholith (Figure 4D). The composition of the matrix deposit is derived from the slope volcanic and glacial deposits (Rodríguez et al., 1999). This geological and soil composition is representative of a typical distribution in the Southern Andes, specifically spanning the latitudinal range from 39° to 42°S.

Below the steepest slope zone of the hillslope, sequences with significant spatial variability were identified (Figure 4B-D). At 350 m a.s.l. (column C3) slopes vary

between 30 up to 45°. The basement associated with the CPfgr crops out at the base, in erosive contact with level S-1, mainly related to glacial deposits with the presence of large angular blocks. Laminar levels of clay and silt towards the top (S-2) stand out. Above the glacial deposit is level S-3. At first glance, the paleosol observed in c2 appears to have a relative age younger than the glacial deposits but older than the Neltume ashfall deposit. However, field observations indicate that paleosol S-3 is younger than the Neltume ashfall, as level S-4 in c3 represents a reworked deposit derived from this ashfall event (S-4). The presence of imbricated pyroclasts and their noticeable variation in thickness (Figure 3D) support this interpretation. Finally, at the top of the sequence illustrated in columns c3 and c4, level S-7 shows active soil development, reaching approximately half of the thickness observed in column c1. Near the base of the flow, at an altitude of 250 m a.s.l. and with slopes between 0 and 20°, a sequence without the levels observed in the previous points upstream was identified (Figure 4). The area represented by column C4, showed soil levels associated with previous mass wasting events (Figure 3E). At the base, level S-5 is identified, associated with a polymictic deposit with a high presence of clasts, reaching a size up to 10 cm, and slight northern imbrication. The matrix of the deposit has pumice content from the Neltume deposit (S-4), related to the explosive event of the Mocho-Choshuenco volcanic complex, and clays from the glacial deposits (S-1 and S-2), present upstream as observed in columns c1 and c3. Above the flow is another level (S-6) with the same characteristics, but with a lower proportion of clasts with respect to the matrix. Finally, towards the top, the development of the current soil (S-7) is observed, with a thickness like that measured in column c3.

**Modified text in lines (200-240).**

Stratigraphic analysis along the slope (Figure 5B–D) reveals a consistent sequence overlying the CPfgr basement, characterized by a basal glacial deposit (S-1) with large angular clasts, overlain by silt–clay layers (S-2). These low-permeability units are covered by interbedded paleosols and volcanic ash-falls. In column C3, the paleosol S-3 was initially considered older than the Neltume ashfall, but the presence of reworked pyroclasts in S-4 (Figure 4D) suggests a younger relative age. The upper sequence concludes with active soil formation (S-7; Figure 5D).

Further downslope (250 m a.s.l.), column C4 exhibits a distinct stratigraphy dominated by mass-wasting deposits. The basal level (S-5) consists of a polymictic unit with sub-rounded clasts and pumice fragments from the Neltume event, embedded in a clay-rich matrix derived from upstream glacial units. A similar, though finer, deposit (S-6) overlies S-5, and is capped by the same modern soil unit (S-7). This stratigraphic framework—composed of alternating low-permeability substrates and reworked tephras—is representative of Andean terrains between 39° and 42°S and is critical to understanding hydrological storage and slope instability (Figure 1).

Figure 6A does not appear to indicate an anomalous trend in soil moisture compared to previous years. It should be emphasized that the combination of saturated soil and intense rainfall plays a key role in triggering debris flows.

**A:** Thanks for this comment. We agree the point out of the reviewer. Now, we emphasized the idea in the section 4.2 considering a rewriting of a paragraph and an additional discussion (and limitations of the study) in sections 5.2 and 5.3

**Original text in section 4.2:**

Analysis using the ERA5 model reveals a pronounced annual cycle in soil moisture (Figure 6). Antecedent precipitation data indicated a surface saturation, showing a shallow condition reaching a full saturation in the first metre of depth, mainly related to previous rainfall events (Figure 6B-C). Moreover, a substantial increase in soil moisture was identified at greater depths (up to 2.89 meters), exhibiting a rapid 50% change preceding the onset of flow events (Figure 6B). This notable fluctuation in soil moisture occurred specifically at the interface between tephra and till-varves, implying potential implications for the natural stability of the terrain base.

**Modified text in section 4.2:**

Analysis using the ERA5 model reveals a well-defined annual cycle in soil moisture (Figure 8A). While the overall evolution of moisture content does not indicate an anomalous trend when compared to previous years, significant short-term variations in soil moisture were observed (Figure 8B) in response to extreme precipitation events (Figure 8C). The preliminary results showed that antecedent rainfall led to surface saturation, with moisture levels reaching full saturation within the first metre of soil depth, primarily due to accumulated rainfall in the days prior (Figure 8B–C). Notably, a substantial and rapid increase in soil moisture was also detected at greater depths—up to 2.89 meters—where a 50% change occurred shortly before the onset of debris flow events (Figure 8B). This marked fluctuation was concentrated at the interface between tephra and till-varves, suggesting critical implications for slope instability. Our findings underscore that, even in the absence of a long-term anomalous trend, the combination of saturated soil conditions and intense rainfall plays a decisive role in triggering debris flows.

**Added paragraph to section 5.2:**

Climate change is increasingly debris flow generation by altering precipitation patterns and soil moisture dynamics (Talebi et al., 2007). In the Southern Andes, volcanic soils with variable textures play a critical role in this process. Enhanced seasonal moisture variability, exacerbated by extreme precipitation, leads to fast soil saturation, especially where fine-grained soils form low-permeability layers above coarser materials (Figure

10). These stratified soil conditions promote subsurface water storage, increasing the slope instability under saturated conditions (Talebi et al., 2007). Fine volcanic over glacial deposits can act as lubricants, further weakening slope cohesion and promoting failure (Espinosa et al., 2024) during intense rainfall, as happened during the Ñisoleufu event (Figure 7B). This event highlights how short-duration storms, increasingly associated with climate change, can overwhelm the buffering capacity of mountainous terrain. The soil media S-7 and S-4, both composed of organic-rich and granular volcanic materials, played a critical role in this response. During the 2023 event, infiltrating rainwater rapidly percolated through these coarse upper layers until reaching the underlying varved glacial sediments (S-2), which have significantly lower permeability. This layering caused a perched water table, increasing the pore pressure and reducing shear strength, ultimately contributing to slope failure. These effects were captured in our remote sensing observations, which showed expanded saturated zones and local instability near the contact between volcanic and glacial deposits.

## Discussion

**C:** The discussion appropriately addresses the key findings but could benefit from a more critical evaluation of the limitations of the study.

**A:** We agree. Now, we added additional information about the limitation of PS data as limitation. Moreover, we discuss in detail the main limitations in section 5.2 and 5.3.

New paragraph in 5.2 related to limited PS

Our results showed a limited amount of PS in the study area similar to previous studies in the area (Vasquez-Antipan et al., 2025). The Southern Andes, and the Ñisoleufu area, is characterized by complex geomorphological features and varying precipitation patterns that could introduce uncertainty to the remote sensing measurements. The application of limited persistent scatterer data in assessing slope deformations offers a promising avenue for the development of a landslide early warning system (LEWS) in the Southern Andes. However, the investigation into this method requires a thorough understanding of potential limitations, particularly the extensive vegetation cover in the Southern Andes, which can obscure satellite signals and affect data accuracy. Vegetation serves as a significant barrier to radar signals, leading to incomplete datasets that might obscure important geological signals indicative of slope movements (Maragaño-Carmona et al., 2023). Therefore, additional efforts must be considered to move forward to an operational scale.

### New paragraph in 5.3

Our study contributes to understanding the relationship between volcanic and glacial deposits under extreme rainfall events forcing in the Southern Andes. However, further research is necessary to improve the RIL susceptibility models due to an incomplete integration of critical soil properties. Several studies focus on rainfall thresholds as primary trigger, oversimplifying the failure mechanisms. Our study proposes that additional assessment of the hydraulic and mechanical influence of specific soil layers must be considered. Additionally, the pronounced spatial heterogeneity in soil layer composition in Southern Andes, ranging from S-1 to S-7, and variability in thickness and permeability, further complicates predictive accuracy to regional scale. Future developments must consider high-resolution subsurface mapping introducing national scale models (Dinamarca et al., 2024), allowing better RIL risk models overlooking zones where possible saturated soil could appear, leading to sudden failure. Moreover, surface deformation frequently observed as a slow extensional signal prior to collapse introduces a limited amount of PS. Moreover, the hydrometeorological variability indicates that better soil moisture models are necessary in the zone to improve the slope stability analysis. Together, these limitations highlight the urgent need for multidisciplinary approaches that integrate geotechnical, geomorphological, and hydrometeorological data into landslide hazard assessments.

**C:** The role of climate change in debris flow initiation is briefly mentioned but not fully explored. Given the relevance of this factor, a more detailed discussion would enhance the manuscript's impact.

**A:** We agree. We have now included a more in-depth discussion of our study and its implications, taking into account the new Figure 1 and the scientific results. This discussion has been incorporated into Sections 5.2 and 5.3.

### New Figure:

**Figure 1** Rainfall-Induced mass wasting in Southern Andes. A) Regional map of Ice-sheet extension during 35 ka and 20 ka as an example, and volcanoes emplaced in the area. B) Zoom to the study area with Ñisoleufu in the Northern Ice Sheet sector, showing the weather stations. C) Zoom to Northern Patagonian area showing correlation between mass wasting events and moraine lines (blue line). D) Zoom to the Osorno volcano area showing the debris flow release area discussed in Fustos et al., 2022.

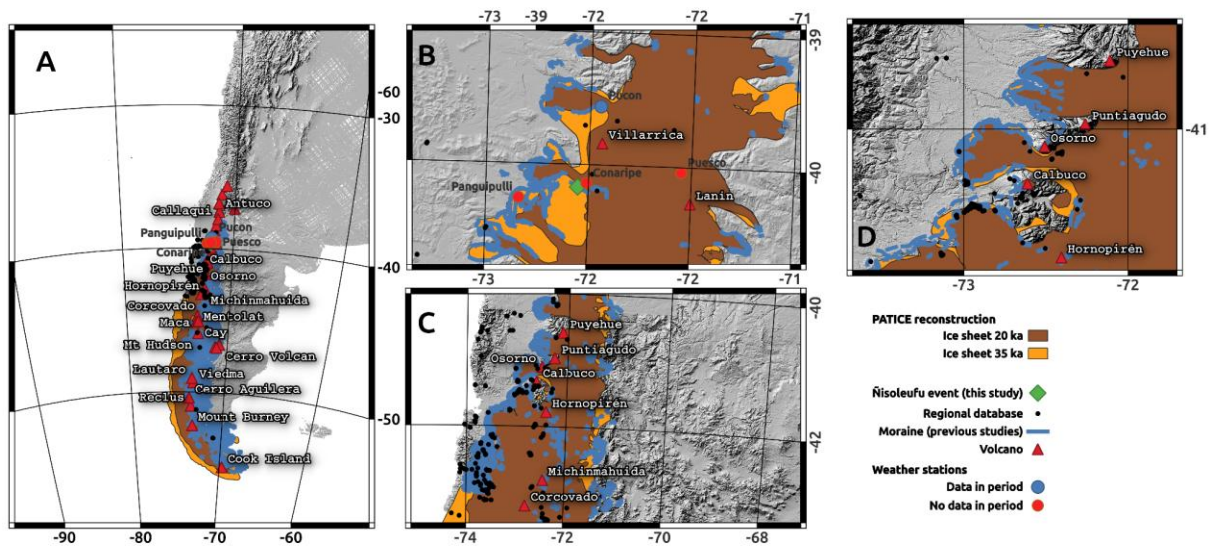

## New paragraph in section 5.2

Climate change is increasingly debris flow generation by altering precipitation patterns and soil moisture dynamics (Talebi et al., 2007). In the Southern Andes, volcanic soils with variable textures play a critical role in this process. Enhanced seasonal moisture variability, exacerbated by extreme precipitation, leads to fast soil saturation, especially where fine-grained soils form low-permeability layers above coarser materials (Figure 10). These stratified soil conditions promote subsurface water storage, increasing the slope instability under saturated conditions (Talebi et al., 2007). Fine volcanic over glacial deposits can act as lubricants, further weakening slope cohesion and promoting failure (Espinosa et al., 2024) during intense rainfall, as happened during the Nisoleufu event (Figure 7B). This event highlights how short-duration storms, increasingly associated with climate change, can overwhelm the buffering capacity of mountainous terrain. The soil media S-7 and S-4, both composed of organic-rich and granular volcanic materials, played a critical role in this response. During the 2023 event, infiltrating rainwater rapidly percolated through these coarse upper layers until reaching the underlying varved glacial sediments (S-2), which have significantly lower permeability. This layering caused a perched water table, increasing the pore pressure and reducing shear strength, ultimately contributing to slope failure. These effects were captured in our remote sensing observations, which showed expanded saturated zones and local instability near the contact between volcanic and glacial deposits.

### **New text introduced in section 5.3**

On a regional scale, climate change is intensifying debris flow hazards worldwide (Gariano and Guzzetti, 2016). In the Southern Andes, current changes in precipitation patterns will affect the stability of volcanic and glacial deposits through alterations in water storage, as noted in this study (Figure 8B). The region's unique stratigraphy in South America, where volcanic soils overlay glacial sediments, may become unstable during extreme rainfall events. Significant shifts in precipitation patterns, as predicted by CMIP6 models, alter the spatial distribution of precipitation and their impact on soil moisture storage, with limited accurate estimations (Salazar et al., 2023). We propose that future developments should carefully constrain areas with high susceptibility to debris flow. Therefore, improved hazard debris flow delimitation and instrumental monitoring become critical for reducing the impact of these hazards in the Southern Andes.

Our study contributes to understanding the relationship between volcanic and glacial deposits under extreme rainfall events forcing in the Southern Andes. However, further research is necessary to improve the RIL susceptibility models due to an incomplete integration of critical soil properties. Several studies focus on rainfall thresholds as primary trigger, oversimplifying the failure mechanisms. Our study proposes that additional assessment of the hydraulic and mechanical influence of specific soil layers must be considered. Additionally, the pronounced spatial heterogeneity in soil layer composition in Southern Andes, ranging from S-1 to S-7, and variability in thickness and permeability, further complicates predictive accuracy to regional scale. Future developments must consider high-resolution subsurface mapping introducing national scale models (Dinamarca et al., 2024), allowing better RIL risk models overlooking zones where possible saturated soil could appear, leading to sudden failure. Moreover, surface deformation frequently observed as a slow extensional signal prior to collapse introduces a limited amount of PS. Moreover, the hydrometeorological variability indicates that better soil moisture models are necessary in the zone to improve the slope stability analysis. Together, these limitations highlight the urgent need for multidisciplinary approaches that integrate geotechnical, geomorphological, and hydrometeorological data into landslide hazard assessments.

## References:

- Espinosa, L., Portela, M., & Gharbia, S. (2024). Assessing changes in exceptional rainfall in Portugal using era5-land reanalysis data (1981/1982–2022/2023). *Water*, 16(5), 628. <https://doi.org/10.3390/w16050628>
- Iverson, N., Mann, J., & Iverson, R. (2010). Effects of soil aggregates on debris-flow mobilization: results from ring-shear experiments. *Engineering Geology*, 114(1-2), 84-92. <https://doi.org/10.1016/j.enggeo.2010.04.006>
- Talebi, A., Uijlenhoet, R., and Troch, P. A.: Soil moisture storage and hillslope stability, *Nat. Hazards Earth Syst. Sci.*, 7, 523–534, <https://doi.org/10.5194/nhess-7-523-2007>, 2007.
- Salazar, Á., Thatcher, M., Goubanova, K., Bernal, P., Gutiérrez, J., and Squeo, F.: CMIP6 precipitation and temperature projections for Chile, *Clim Dyn*, 62, 2475–2498, <https://doi.org/10.1007/s00382-023-07034-9>, 2023.

## Conclusions

The conclusions effectively summarize the main findings but lack specific recommendations for hazard mitigation. Consider adding a few practical insights based on the study's results.

**A:** Thanks for this comment. We agree with the point of the reviewer. Now, we emphasize this idea in the last paragraph of Conclusion.

## New paragraph in Conclusions:

Finally, our results demonstrate the value of integrating geomorphological, hydrometeorological, and hydrogeotechnical data to support debris-flow hazard assessments. In particular, the combination of tephra layers overlying low-permeability glacial deposits, together with rapid water infiltration on steep slopes during extreme rainfall events, defines a critical configuration that enhances susceptibility to failure. This integrated framework provides a robust basis for identifying high-risk areas and strengthening early warning strategies in the Southern Andes and comparable volcanic-glacial settings worldwide.
